# Supplementary material for: Enhancing reaction rate in a Pickering emulsion system with natural magnetotactic bacteria as nanoscale magnetic stirring bars
Source: Royal Society of Chemistry journal article supplement (doi:10.1039/c7sc05164f), 2018-01-01
Supplement: c7sc05164f1.pdf [file c7sc05164f1.pdf]

## **Electroni Supplementary Information(ESI)**

### **Enhancing reaction rate in Pickering emulsion system with natural magnetotactic bacteria as nanoscale magnetic stirring bars**

Xin Zhou,<sup>[a, b]</sup> Changyou Chen,<sup>[c]</sup> Changyan Cao, <sup>\*[a, b]</sup> Tao Song,<sup>[c]</sup> Hengquan Yang<sup>[d]</sup>  
and Weiguo Song<sup>\*[a, b]</sup>

<sup>a</sup> Beijing National Laboratory for Molecular Sciences, Laboratory of Molecular Nanostructures and Nanotechnology CAS Research/Education Center for Excellence in Molecular Sciences, Institute of Chemistry, Chinese Academy of Sciences, Beijing 100190 (China). \*E-mail: [cycas@iccas.ac.cn](mailto:cycas@iccas.ac.cn), [wsong@iccas.ac.cn](mailto:wsong@iccas.ac.cn)

<sup>b</sup> University of Chinese Academy of Sciences, Beijing100049 (China)

<sup>c</sup> Institute of electrical engineering, Chinese Academy of Sciences, Beijing 100190 (China). \*E-mail: [songtao@mail.iee.ac.cn](mailto:songtao@mail.iee.ac.cn)

<sup>d</sup> School of Chemistry and Chemical Engineering, Shanxi University, Taiyuan 030006 (China). \*E-mail: [hqyang@sxu.edu.cn](mailto:hqyang@sxu.edu.cn)

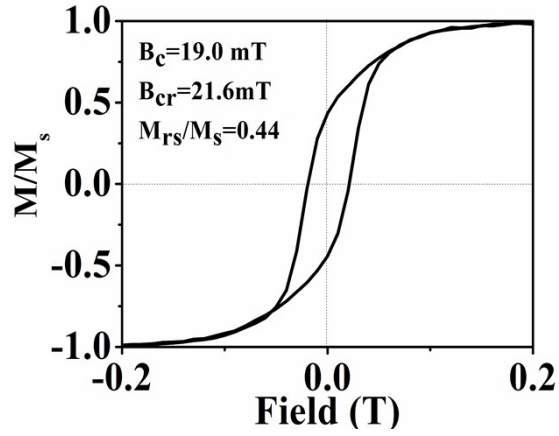

Fig. S1 Hysteretic properties for the bacteria sample.

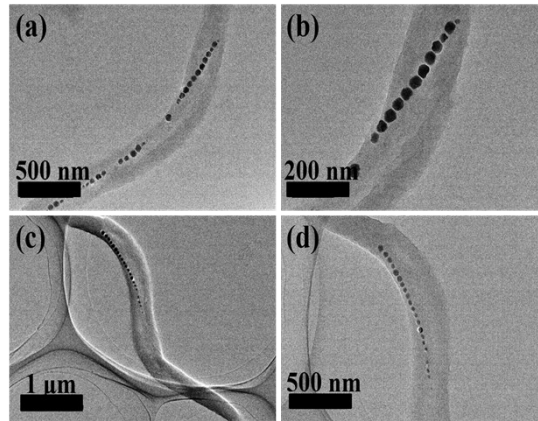

Fig. S2 TEM images of AMB-1 cell after immersed in 5%  $\text{H}_2\text{O}_2$  solution for (a, b) 3 hours and (c, d) 5 hours.

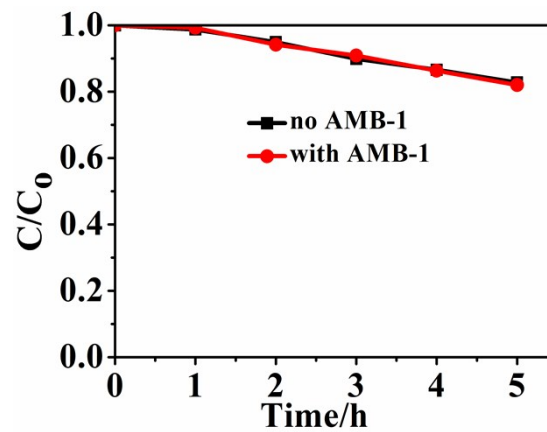

Fig. S3 Variation in concentration versus reaction time curves for  $\text{H}_2\text{O}_2$  solution with/without AMB-1 nanoscale magnetic stirring bars under  $45^\circ\text{C}$ .

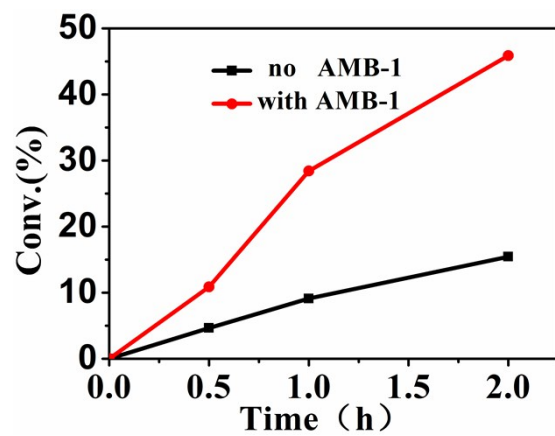

**Fig. S4** Conversion versus reaction time curves for cyclooctene epoxidation with/without AMB-1 nanoscale magnetic stirring bars.
